# Supplementary material for: Spatial distribution of glucose and amino acids within all-aqueous emulsions directs the Maillard reaction and oxidation pathways
Source: Research Square preprint supplement (doi:10.21203/rs.3.rs-7307960/v1), 2025-08-19
Supplement: Supplementary file 1 [file 545bb72b0ef51dc7b94a11da.xlsx]

## Sheet: Compounds
Name	Formula	Annot. DeltaMass [ppm]	Calc. MW	m/z	RT [min]	Neutral Losses	Reference Ion
Myristoyl Ethanolamide	C16 H33 N O2	-0.36	271.251	272.258	1.058	CO2	[M+H]+1
Caprolactam	C6 H11 N O	-1.36	113.084	114.091	1.097	C2H5OH;CH2C=O;CO;H2C=CH2;H2O;NH3	[M+H]+1
3-hydroxybenzylhydrazine	C7 H10 N2 O	-0.58	138.079	139.087	1.15	C2H5OH;CH3CH=CH2;CH3CO;CH3O;CH3OH;CO;H2C=CH2;H2C=O;H2O	[M+H]+1
	C5 H13 N O	-1.42	103.1	104.107	1.188	C2H5O;C2H5OH;H2O	[M+H]+1
	C9 H13 N3 O	-0.5	179.106	180.113	1.216		[M+H]+1
Citraconic acid	C5 H6 O4	0.52	130.027	129.019	1.269	CH2C=O;CO2;H2;H2C=O	[M-H]-1
	C10 H3 N2 O P S	0.82	229.971	228.963	1.271		[M-H]-1
	C3 H5 N O	0.45	71.0371	72.0444	1.294	CO;H2C=CH2;H2C=O;H2O;NH3	[M+H]+1
	C7 H8 N2 O3	-0.1	168.053	167.046	1.354	CO2	[M-H]-1
	C8 H26 N9 O3 P	-1.61	327.189	328.196	1.38		[M+H]+1
4,6-Dimethyl-2(1H)-pyrimidinone	C6 H8 N2 O	-0.85	124.064	125.071	1.392	CH2C=O;CH3CO;CO;H2O	[M+H]+1
4,6-Dimethyl-2(1H)-pyrimidinone	C6 H8 N2 O	-0.92	124.064	125.071	1.448	CH2C=O;CH3CO;CO;H2C=O;H2O	[M+H]+1
	C8 H6 N8 O12	1.71	406.011	405.004	1.465		[M-H]-1
1-acetylimidazole	C5 H6 N2 O	-1.31	110.048	111.055	1.533	CH2C=O;CO;H2O	[M+H]+1
3-(2-aminopyridin-4-yl)propanamide	C8 H11 N3 O	-0.41	165.09	166.097	1.556		[M+H]+1
3-Oxo-N-(2-oxotetrahydro-3-furanyl)butanamide	C8 H11 N O4	-0.07	185.069	184.062	1.562	CH2C=O;CO2	[M-H]-1
3-Hydroxypyridine	C5 H5 N O	-1.17	95.037	96.0443	1.568	CO	[M+H]+1
N-Hydroxysuccinimide	C4 H5 N O3	0.14	115.027	114.02	1.575	CO2;H2O	[M-H]-1
	C14 H29 N3 O2	-0.35	271.226	272.233	1.593		[M+H]+1
	C12 H22 N2 O2	-0.37	226.168	227.175	1.595	H2O	[M+H]+1
Pyridoxamine	C8 H12 N2 O2	-0.39	168.09	169.097	1.6	C2H3O2;C2H5OH;CH3COOH;H2C=O;H2O	[M+H]+1
	C7 H8 N2 O2	-0.17	152.059	153.066	1.602	NH3	[M+H]+1
	C7 H5 N O2	-0.33	135.032	136.039	1.603	CH2C=O;CH3CO;CO;CO2;H2O	[M+H]+1
Ethylmalonic acid	C5 H8 O4	0.14	132.042	131.035	1.605	CH3COOH;CO2;H2C=O;H2O	[M-H]-1
D-Glucono-δ-lactone	C6 H10 O6	0.13	178.048	177.04	1.636	Pentose	[M-H]-1
3-(3-methoxyisoxazol-5-yl)propanoic acid	C7 H9 N O4	0.05	171.053	170.046	1.733	CO2;CONH2;HCN;NH3	[M-H]-1
Pantothenol	C9 H19 N O4	-0.43	205.131	206.139	1.811	H2O	[M+H]+1
5-Allyl-2-amino-6-methylpyrimidin-4-ol	C8 H11 N3 O	-0.26	165.09	166.097	1.816		[M+H]+1
	C10 H6 N4 O14 S	-2.22	437.959	436.952	1.895		[M-H]-1
	C10 H3 N2 O P S	0.87	229.971	228.963	1.916		[M-H]-1
	C8 H11 N2 O16 P	1.31	421.985	420.978	1.929		[M-H]-1
	C8 H13 N2 O8 P	-0.27	296.041	295.034	2.023		[M-H]-1
	C14 H4 N P S	0.24	248.98	249.988	2.024	CO2	[M+H]+1
	C9 H7 N O	0.1	145.053	144.046	2.024	CO;HCN	[M-H]-1
	C10 H7 N O3	-0.23	189.043	188.035	2.028	CO2	[M-H]-1
	C11 H8 N O P S	-0.33	233.006	234.014	2.028	CO2	[M+H]+1
α-ketoadipic acid	C6 H8 O5	0.14	160.037	159.03	2.064	CH3COOH;CO2;H2O	[M-H]-1
	C16 H10 N2 O9 S	1.22	406.011	405.004	2.076		[M-H]-1
	C10 H7 N O3	-0.12	189.043	188.035	2.274	CO2	[M-H]-1
Succinic acid	C4 H6 O4	0.23	118.027	117.019	2.343	CO;CO2;H2O	[M-H]-1
	C7 H15 N O3	-0.3	161.105	162.112	2.347	CH3COOH	[M+H]+1
ethyl 4-hydroxy-2-methyl-5-pyrimidinecarboxylate	C8 H10 N2 O3	0.12	182.069	181.062	2.56	CO2;Pyroglutamic Acid	[M-H]-1
1H-pyrrole-2-carboxamide	C5 H6 N2 O	-1.3	110.048	111.055	2.566	HCN;NH3	[M+H]+1
3-(1-hydroxyethyl)-2,3,6,7,8,8a-hexahydropyrrolo[1,2-a]pyrazine-1,4-dione	C9 H14 N2 O3	-0.39	198.1	199.108	2.599	H2O	[M+H]+1
3-(1-hydroxyethyl)-2,3,6,7,8,8a-hexahydropyrrolo[1,2-a]pyrazine-1,4-dione	C9 H14 N2 O3	-0.45	198.1	199.108	2.789	H2O	[M+H]+1
2[5H]-furanone	C4 H4 O2	-0.18	84.0211	83.0138	2.925	CO	[M-H]-1
3-Deoxyglucosone	C6 H10 O5	0.13	162.053	161.046	2.94		[M-H]-1
N(2)-succinyl-L-glutamic acid	C9 H13 N O7	-0.02	247.069	246.062	2.947	Hexose	[M-H]-1
Methyl 2,4-dioxo-3-pyrrolidinecarboxylate	C6 H7 N O4	0.09	157.038	156.03	2.977	CH3COOH;CONH2;H2O;HCN;NH3	[M-H]-1
	C5 H8 N O P S	-0.14	161.006	162.014	3.11	H2O	[M+H]+1
	C8 H4 N P S	0.51	176.98	177.988	3.11		[M+H]+1
	C4 H5 N O2	-1.16	99.0319	100.039	3.113	CO;H2O;HCN	[M+H]+1
	C4 H7 N O3	-0.11	117.043	116.035	3.116	CO2;H2O;NH3	[M-H]-1
	C11 H7 N S	0.53	185.03	184.023	3.118		[M-H]-1
	C8 H12 N2 O3	-0.59	184.085	185.092	3.27	H2O	[M+H]+1
	C7 H10 N O5 P S	0.18	251.002	249.994	3.584		[M-H]-1
	C6 H10 O13	1.83	290.013	289.005	3.585		[M-H]-1
	C6 H8 N O3 P S	0.24	204.996	203.989	3.585		[M-H]-1
Dimethyl 4-hydroxy-1H-pyrazole-3,5-dicarboxylate	C7 H8 N2 O5	-0.07	200.043	199.036	3.589		[M-H]-1
	C2 H4 N O5 P	0.81	152.983	151.976	3.591		[M-H]-1
	C3 H5 N O	0.2	71.0371	70.0298	3.591	H2C=CH2	[M-H]-1
N-Hydroxysuccinimide	C4 H5 N O3	-0.13	115.027	114.02	3.596	CO2	[M-H]-1
	C5 H10 O11	1.6	246.023	247.03	3.662	CO2;H2O	[M+H]+1
4-[Amino(carboxy)methyl]-5-oxoproline	C7 H10 N2 O5	-0.13	202.059	201.052	3.691	CO2;H2O	[M-H]-1
Phenyl sulfoxide	C12 H10 O S	0.67	202.045	201.038	3.745		[M-H]-1
N-[6-(4-Morpholinyl)-4,7-dioxo-4,7-dihydro-2,1,3-benzoxadiazol-5-yl]acetamide	C12 H12 N4 O5	0.04	292.081	291.074	3.762		[M-H]-1
1-(4-Nitrophenyl)imidazole	C9 H7 N3 O2	0.16	189.054	188.047	3.768		[M-H]-1
	C9 H9 N3 O3	-0.39	207.064	206.057	3.769	C2H3O2;H2O;NH3	[M-H]-1
	C4 H6 N O P S	0.16	146.991	147.998	3.778	CO2	[M+H]+1
Glycolic acid	C2 H4 O3	-0.01	76.016	75.0088	3.8	CO;H2	[M-H]-1
Formylglycine	C3 H5 N O3	-0.56	103.027	102.02	3.812	CH3COOH;CO2	[M-H]-1
	C7 H10 N2 O2	-0.65	154.074	155.081	3.814		[M+H]+1
3-Deoxyglucosone	C6 H10 O5	0.08	162.053	161.046	3.822	CH3COOH;H2C=O	[M-H]-1
2,3-Dihydroxybenzoic acid	C7 H6 O4	0.08	154.027	153.019	3.852	CO2;HCCH	[M-H]-1
	C10 H5 N O11	2.29	314.987	313.98	3.933		[M-H]-1
N-Methylcaprolactam	C7 H13 N O	-0.85	127.1	128.107	3.944	C2H5OH;CH3CH=CH2;H2C=CH2;H2O	[M+H]+1
N-Methylcaprolactam	C7 H13 N O	-0.96	127.1	128.107	4.07	H2C=CH2;H2O	[M+H]+1
(S)-Nicotine	C10 H14 N2	-0.49	162.116	163.123	4.116		[M+H]+1
	C7 H4 N6 O	1.67	188.045	189.052	4.21		[M+H]+1
Benzoyl thiol	C11 H8 O S	0.4	188.03	187.022	4.218	CH3COOH	[M-H]-1
D-(−)-Erythrose	C4 H8 O4	0.21	120.042	119.035	4.218	CH3COOH;H2O	[M-H]-1
	C3 H9 O8 P	0.63	204.004	202.996	4.221		[M-H]-1
	C10 H10 N4 O4	-0.01	250.07	249.063	4.374		[M-H]-1
Ethyl 4-[(2-methoxy-2-oxoethyl)carbamoyl]-1H-imidazole-5-carboxylate	C10 H13 N3 O5	0.06	255.086	254.078	4.374		[M-H]-1
3-nitrobenzimidamide	C7 H7 N3 O2	-0.2	165.054	164.047	4.376	CONH2;H2O;HCN;NH3	[M-H]-1
	C8 H9 N3 O4	0	211.059	210.052	4.377		[M-H]-1
Hexamethylenetetramine	C6 H12 N4	-0.5	140.106	141.113	4.541	C2H5O;CH3CO;OH	[M+H]+1
	C4 H11 N O	-0.82	89.084	90.0913	4.551	C2H5OH;CH5O;H2O;NH3	[M+H]+1
Diethanolisopropanolamine	C7 H17 N O3	-0.59	163.121	164.128	4.629	C2H5OH	[M+H]+1
Hexitol	C6 H14 O6	0.05	182.079	181.072	4.778		[M-H]-1
Diethanolamine	C4 H11 N O2	-1.47	105.079	106.086	4.8	C2H5OH;H2O	[M+H]+1
Myristyl sulfate	C14 H30 O4 S	-0.02	294.186	293.179	4.813		[M-H]-1
	C4 H8 N6 O3	0.69	188.066	189.073	4.954		[M+H]+1
α,α′-Diglycerol	C6 H14 O5	-0.88	166.084	167.091	4.961	H2O	[M+H]+1
4-{3-[(4-hydroxy-3-methoxyphenyl)methyl]-2-methylbutyl}benzene-1,2-diol	C19 H24 O4	69528.5	338.15	339.157	4.999		[M+H]+1
1,8-Diaminooctane	C8 H20 N2	-0.56	144.163	145.17	5.05	NH3	[M+H]+1
Cyclohexylamine	C6 H13 N	-1.53	99.1047	100.112	5.083	C2H6;C3H7;C4H8;CH3;CH3CH=CH2;H2C=CH2;NH3	[M+H]+1
	C14 H27 O8 P	2.27	354.145	355.152	5.092		[M+H]+1
	C11 H22 N6 O4 S	0.89	334.143	333.135	5.118		[M-H]-1
	C20 H34 O3 S	-1.43	354.222	353.215	5.13		[M-H]-1
	C15 H31 O6 P S2	-0.35	402.13	401.123	5.131		[M-H]-1
	C13 H27 O2 P S2	-0.52	310.119	311.126	5.133		[M+H]+1
2-Methyl-2-propanyl 5-(cyanomethyl)-3-methyl-2-(2-methyl-2-propanyl)-4-oxo-1-imidazolidinecarboxylate	C15 H25 N3 O3	0.81	295.19	294.183	5.159		[M-H]-1
	C14 H30 O4 S	0.06	294.187	293.179	5.172		[M-H]-1
	C24 H18 O3	-4.37	354.124	355.131	5.174		[M+H]+1
	C15 H25 N6 O3 P S	0.29	400.145	401.152	5.175		[M+H]+1
	C14 H33 N6 O8 P S	0.34	476.182	475.175	5.195		[M-H]-1
	C16 H34 O5 S	0	338.213	337.205	5.196		[M-H]-1
	C15 H31 O2 P S2	-0.84	338.15	339.157	5.2		[M+H]+1
	C20 H33 O P S2	-0.63	384.171	385.178	5.218		[M+H]+1
	C20 H42 O7 S	-0.26	426.265	425.258	5.221		[M-H]-1
	C20 H42 O8 S	-0.35	442.26	441.253	5.223		[M-H]-1
Ethyl 2-({2-[2-(2,3-dihydro-1,4-benzodioxin-6-ylamino)-2-oxoethyl]-1-oxo-1,2-dihydroisoquinolin-5-yl}oxy)propanoate	C24 H24 N2 O7	0.14	452.158	453.166	5.225		[M+H]+1
	C21 H23 O5 P	2.04	386.129	387.136	5.233		[M+H]+1
	C14 H30 O5 S	0.04	310.181	309.174	5.248		[M-H]-1
	C16 H34 O6 S	-0.4	354.207	353.2	5.251		[M-H]-1
	C5 H11 N O2	-1.52	117.079	118.086	5.253	C2H3O2;C2H5OH;CH3COOH	[M+H]+1
	C15 H31 O3 P S2	-0.48	354.145	355.152	5.256		[M+H]+1
	C18 H35 N2 P S4	1.22	438.143	439.15	5.26		[M+H]+1
3,4,5,6-Tetraphenyl-2H-pyran-2-one	C29 H20 O2	-4.85	400.144	401.152	5.26		[M+H]+1
	C15 H31 O6 P S2	-0.16	402.13	401.123	5.264		[M-H]-1
	C21 H28 O6	58434.5	398.171	399.178	5.277		[M+H]+1
	C19 H30 O3 S	0.49	338.192	337.184	5.296		[M-H]-1
	C17 H22 N10 O15 S	-2.01	638.097	637.09	5.374		[M-H]-1
N-α-Acetyl-L-asparagine	C6 H10 N2 O4	-0.06	174.064	173.057	5.395	CH2C=O;CH3COOH;CO2;H2O;NH3	[M-H]-1
5-Hexylaminomethylene-1,3-dimethyl-pyrimidine-2,4,6-trione	C13 H21 N3 O3	1.43	267.159	266.151	5.473		[M-H]-1
Diphenyl sulfone	C12 H10 O2 S	0.43	218.04	217.033	5.493		[M-H]-1
8-[(Methylsulfanyl)methyl]-6-propylergoline	C19 H26 N2 S	2.02	314.182	313.175	5.502		[M-H]-1
Hexamethylenetetramine	C6 H12 N4	-0.84	140.106	141.113	5.502	CH3CO;OH	[M+H]+1
	C10 H14 N2	-0.71	162.116	163.123	5.514		[M+H]+1
	C4 H8 N6 O2	0.69	172.071	173.078	5.556		[M+H]+1
1,8-Diaminooctane	C8 H20 N2	-0.64	144.163	145.17	5.608		[M+H]+1
	C3 H5 N O6 S	-0.34	182.984	181.976	5.657		[M-H]-1
	C4 H7 O4 P S	0.28	181.98	180.973	5.682		[M-H]-1
2-Amino-3-hydroxypropanoate	C3 H6 N O3	1	104.035	105.042	5.686		[M+H]+1
D-(+)-Galactose	C6 H12 O6	0.08	180.063	179.056	5.782	CH3COOH	[M-H]-1
	C6 H13 Cl O6	-0.01	216.04	215.033	5.782	HCl	[M-H]-1
Glucoheptonic Acid	C7 H14 O8	-0.09	226.069	225.062	5.787		[M-H]-1
1-(3-Aminopropyl)-4-Methylpiperazine	C8 H19 N3	-0.66	157.158	158.165	5.899	NH3	[M+H]+1
	C5 H8 N2 O4	0.05	160.048	159.041	5.912	CO2;H2O;NH3	[M-H]-1
5-(hydroxymethyl)pyrimidine-2,4(1H,3H)-dione	C5 H6 N2 O3	0.16	142.038	141.031	5.915	CH2C=O	[M-H]-1
D-(+)-Galactose	C6 H12 O6	0.13	180.063	179.056	6.026	CH3COOH	[M-H]-1
	C9 H15 N O8	0.12	265.08	264.073	6.028		[M-H]-1
	C9 H18 O9	0.2	270.095	269.088	6.028		[M-H]-1
	C6 H13 Cl O6	0.11	216.04	215.033	6.029	HCl	[M-H]-1
D-(−)-Erythrose	C4 H8 O4	0.19	120.042	119.035	6.03	CH3COOH;H2C=O;H2O	[M-H]-1
N,N-Diethyl-2,4-dinitroaniline	C10 H13 N3 O4	-0.44	239.09	238.083	6.038	NH3	[M-H]-1
3-amino-2,3-dedeoxy-scyllo-inosose	C6 H11 N O4	-0.78	161.069	162.076	6.079	CH3COOH;H2O;NH3	[M+H]+1
Endothal	C8 H10 O5	0.05	186.053	185.046	6.183	CH2C=O;CH3COOH;CO;CO2;H2O	[M-H]-1
D-(+)-Mannose	C6 H12 O6	0.04	180.063	179.056	6.217	CH3COOH;CO2;H2O	[M-H]-1
Diethyl (E)-azodicarboxylate	C6 H10 N2 O4	-0.75	174.064	175.071	6.232	CH3COOH;H2O;NH3;Pyroglutamic Acid	[M+H]+1
	C13 H18 N2 O9	-0.5	346.101	345.094	6.233		[M-H]-1
	C5 H8 N6 O6	1.11	248.051	247.044	6.26		[M-H]-1
2,3-Dihydroxypropyl 2,6-dioxo-1,2,3,6-tetrahydro-4-pyrimidinecarboxylate	C8 H10 N2 O6	-0.21	230.054	229.047	6.261	CO2;H2O	[M-H]-1
5-Amino-11,12-dihydroxy-8,13-dioxa-2,4-diazatricyclo[8.2.1.0~2,7~]trideca-4,6-dien-3-one	C9 H11 N3 O5	-0.16	241.07	240.063	6.283	CO2;H2O	[M-H]-1
Xylitol	C5 H12 O5	0.29	152.069	151.061	6.301		[M-H]-1
	C11 H18 N2 O8	0.2	306.106	305.099	6.315		[M-H]-1
1,4-dioxaspiro[4.5]decane-7,8,9-trione trioxime	C8 H11 N3 O5	0.18	229.07	228.063	6.316	CO2;H2O	[M-H]-1
acetyl-asparagine isomer	C6 H10 N2 O5	-0.11	190.059	189.052	6.385	H2O	[M-H]-1
L-(−)-Asparagine isomer	C4 H8 N2 O3	-0.58	132.053	131.046	6.416	CH3COOH;H2O;NH3	[M-H]-1
D-Gluconic acid	C6 H12 O7	-0.1	196.058	195.051	6.548		[M-H]-1
D-(+)-Xylose	C5 H10 O5	0.11	150.053	149.046	6.558	CH3COOH	[M-H]-1
	C7 H10 N2 O4	-0.48	186.064	185.057	6.56	CO;NH3	[M-H]-1
	C5 H8 N6 O6	0.85	248.051	247.043	6.587		[M-H]-1
	C6 H10 N6 O8	0.94	294.056	293.049	6.587		[M-H]-1
	C6 H13 N O9	0.02	243.059	242.052	6.601		[M-H]-1
	C9 H15 N O8	-0.02	265.08	264.072	6.603		[M-H]-1
Glutaric acid	C5 H8 O4	0.13	132.042	131.035	6.604	CH3COOH;H2C=O;H2O;NO2	[M-H]-1
	C6 H12 N2 O3	-0.55	160.085	161.092	6.606	NH3	[M+H]+1
Ethanoic anhydride	C4 H6 O3	-0.07	102.032	101.024	6.61	CH2C=O;CO;CO2;H2O	[M-H]-1
lactide	C6 H8 O4	0.12	144.042	143.035	6.61	CH2C=O;CH3COOH;CO;CO2;H2C=O;H2O	[M-H]-1
D-(−)-Erythrose	C4 H8 O4	0.1	120.042	119.035	6.611	CH3COOH;H2C=O;H2O	[M-H]-1
Glutaric anhydride	C5 H6 O3	0.03	114.032	113.024	6.612	CO;H2C=CH2	[M-H]-1
	C6 H13 Cl O6	0.03	216.04	215.033	6.613	HCl	[M-H]-1
7-(2-Furyl)-4H-[1,2,5]oxadiazolo[3,4-b][1,4]diazepin-5(8H)-one	C9 H6 N4 O3	-1.58	218.044	217.036	6.613		[M-H]-1
Acrylic acid	C3 H4 O2	0.14	72.0211	71.0139	6.614	CO;H2C=O;HCCH	[M-H]-1
3-Deoxyglucosone	C6 H10 O5	0.1	162.053	161.046	6.614	CH3COOH;H2C=O;NO	[M-H]-1
D-(+)-Galactose	C6 H12 O6	-0.11	180.063	179.056	6.623	CH3COOH	[M-H]-1
Glucoheptonic Acid	C7 H14 O8	-0.08	226.069	225.062	6.63		[M-H]-1
Ethyl 4-[(2-methoxy-2-oxoethyl)carbamoyl]-1H-imidazole-5-carboxylate	C10 H13 N3 O5	-0.38	255.085	254.078	6.631	CO2;H2O;NH3	[M-H]-1
2',3'-dideoxycytidine	C9 H13 N3 O3	0	211.096	210.088	6.653	H2O	[M-H]-1
	C8 H7 N9 O3	1.17	277.068	276.06	6.654	CO2;H2O	[M-H]-1
D-Glucosamine	C6 H13 N O5	-0.58	179.079	180.087	6.694	H2O	[M+H]+1
2-Aminoadipic acid	C6 H11 N O4	-0.53	161.069	162.076	6.704	CH3COOH;H2O;NH3	[M+H]+1
Ethyl 4-[(2-methoxy-2-oxoethyl)carbamoyl]-1H-imidazole-5-carboxylate	C10 H13 N3 O5	-0.27	255.085	254.078	6.828	CO;NH3	[M-H]-1
2-Aminoadipic acid	C6 H11 N O4	-0.57	161.069	162.076	6.862	H2O	[M+H]+1
Aceglutamide	C7 H12 N2 O4	-0.56	188.08	189.087	6.863	NH3;Pyroglutamic Acid	[M+H]+1
D-Glucosamine	C6 H13 N O5	-0.57	179.079	180.087	6.871	H2O	[M+H]+1
	C9 H10 N2 O4	-0.43	210.064	211.071	6.881	CO2;H2O;NH3	[M+H]+1
	C6 H10 N2 O5	-0.69	190.059	191.066	6.919	H2O	[M+H]+1
	C6 H13 Cl O6	0.07	216.04	215.033	6.929	HCl	[M-H]-1
D-(−)-Erythrose	C4 H8 O4	0.2	120.042	119.035	6.931	CH3COOH;H2C=O;H2O	[M-H]-1
D-(+)-Mannose	C6 H12 O6	0.05	180.063	179.056	6.931	CH3COOH	[M-H]-1
Glucoheptonic Acid	C7 H14 O8	0.01	226.069	225.062	6.931		[M-H]-1
Asparagine isomer	C4 H8 N2 O3	0.19	132.054	131.046	6.968	CH3COOH;CO2;H2O;NH3	[M-H]-1
Guanidinosuccinic acid	C5 H9 N3 O4	-0.28	175.059	174.052	6.971	NH3	[M-H]-1
	C11 H18 N2 O8	0.14	306.106	305.099	6.997		[M-H]-1
	C8 H16 Cl N O6	-0.02	257.067	256.059	7.005		[M-H]-1
	C8 H15 N O6	-0.64	221.09	222.097	7.006	H2O;NH3	[M+H]+1
neuraminic acid	C9 H17 N O8	0.05	267.095	266.088	7.007		[M-H]-1
9-deoxy-9-acetamido-N-acetyl-α-neuraminic acid	C13 H22 N2 O9	-0.42	350.132	349.125	7.012		[M-H]-1
	C12 H20 N2 O7	-0.61	304.127	305.134	7.02	H2O	[M+H]+1
6-(α-D-glucosaminyl)-1D-myo-inositol	C12 H23 N O10	-0.56	341.132	342.139	7.144	H2O	[M+H]+1
	C27 H32 N4 O5	3.57	492.239	491.232	7.153		[M-H]-1
Acrylic acid	C3 H4 O2	0.11	72.0211	71.0139	7.153	CO;H2C=O;HCCH	[M-H]-1
D-(−)-Erythrose	C4 H8 O4	0.18	120.042	119.035	7.153	CH3COOH;H2C=O;H2O	[M-H]-1
D-(-)-Lyxose	C5 H10 O5	0.02	150.053	149.046	7.153	CH3COOH;H2O	[M-H]-1
Glutaric acid	C5 H8 O4	0.1	132.042	131.035	7.153	CH2C=O;CH3COOH;H2C=O;H2O	[M-H]-1
3-Deoxyglucosone	C6 H10 O5	0.09	162.053	161.046	7.153	CH3COOH;H2C=O	[M-H]-1
D-(+)-Glucose	C6 H12 O6	-0.26	180.063	179.056	7.153	CH3COOH	[M-H]-1
lactide	C6 H8 O4	0.12	144.042	143.035	7.153	C2H3O2;CH2C=O;CH3COOH;CO;CO2;H2C=O;H2O	[M-H]-1
Glucoheptonic Acid	C7 H14 O8	-0.21	226.069	225.062	7.153		[M-H]-1
Succinic semialdehyde	C4 H6 O3	-0.13	102.032	101.024	7.154	CH2C=O;CO;CO2;H2;H2C=O;H2O	[M-H]-1
Glutaric anhydride	C5 H6 O3	0.1	114.032	113.024	7.154	CO;H2C=CH2;H2O	[M-H]-1
	C6 H10 N6 O8	0.87	294.056	293.049	7.154		[M-H]-1
	C9 H15 N O8	-0.01	265.08	264.072	7.154		[M-H]-1
	C9 H18 O9	0.04	270.095	269.088	7.154		[M-H]-1
	C6 H13 Cl O6	-0.06	216.04	215.033	7.155		[M-H]-1
	C6 H13 N O9	-0.01	243.059	242.052	7.155		[M-H]-1
	C7 H12 N2 O6	-0.07	220.07	219.062	7.26	CH3COOH;CO2;H2C=O;H2O	[M-H]-1
Ethyl 4-[(2-methoxy-2-oxoethyl)carbamoyl]-1H-imidazole-5-carboxylate	C10 H13 N3 O5	-0.19	255.085	254.078	7.288	CO;H2O;NH3	[M-H]-1
Nitrosobis(2-oxopropyl)amine	C6 H10 N2 O3	-0.49	158.069	159.076	7.329	CO;CO2;H2O;NH3	[M+H]+1
5-Nitro-2,4,6-pyrimidinetriamine 1,3-dioxide	C4 H6 N6 O4	0.96	202.045	203.053	7.42		[M+H]+1
	C12 H24 O12	-0.58	360.127	359.119	7.421		[M-H]-1
N-[[(2R,3S)-8-(3-cyanophenyl)-5-[(2S)-1-hydroxypropan-2-yl]-3-methyl-6-oxo-3,4-dihydro-2H-pyrido[2,3-b][1,5]oxazocin-2-yl]methyl]-N-methyl-4-oxanecarboxamide	C28 H34 N4 O5	3.59	506.255	505.247	7.422		[M-H]-1
1-[(1S)-1-(Hydroxymethyl)-7-methoxy-9-methyl-1′-(2-pyridinylcarbonyl)-1,9-dihydrospiro[β-carboline-4,4′-piperidin]-2(3H)-yl]-2-methoxyethanone	C27 H32 N4 O5	3.68	492.239	491.232	7.427		[M-H]-1
	C6 H13 N O9	0.01	243.059	242.052	7.427		[M-H]-1
	C3 H4 O2	0.13	72.0211	71.0139	7.428	CO;H2C=O;HCCH	[M-H]-1
D-(-)-Lyxose	C5 H10 O5	0.02	150.053	149.046	7.428	CH3COOH;H2O	[M-H]-1
Glutaric anhydride	C5 H6 O3	0.12	114.032	113.024	7.428	CO;H2C=CH2;H2O	[M-H]-1
Glutaric acid	C5 H8 O4	0.16	132.042	131.035	7.428	CH3COOH;H2C=O;H2O	[M-H]-1
3-Deoxyglucosone	C6 H10 O5	0.14	162.053	161.046	7.428	CH3COOH;H2C=O	[M-H]-1
lactide	C6 H8 O4	0.13	144.042	143.035	7.428	C2H3O2;CH2C=O;CH3COOH;CO;CO2;H2C=O;H2O	[M-H]-1
Glucoheptonic Acid	C7 H14 O8	-0.19	226.069	225.062	7.428		[M-H]-1
	C12 H23 N O4 S2	-2.81	309.106	308.099	7.429		[M-H]-1
Ethanoic anhydride	C4 H6 O3	-0.09	102.032	101.024	7.429	CH2C=O;CO;CO2;H2O	[M-H]-1
D-(−)-Erythrose	C4 H8 O4	0.22	120.042	119.035	7.429	CH3COOH;H2C=O;H2O	[M-H]-1
D-(+)-Glucose	C6 H12 O6	-0.26	180.063	179.056	7.429	CH3COOH	[M-H]-1
	C9 H15 N O8	0	265.08	264.072	7.429	Hexose	[M-H]-1
	C6 H13 Cl O6	-0.01	216.04	215.033	7.43		[M-H]-1
	C9 H18 O9	0.07	270.095	269.088	7.43		[M-H]-1
Glu-Glu	C10 H16 N2 O7	0.03	276.096	275.089	7.547	H2O;Hexose	[M-H]-1
N-(4-Methoxy-2-nitrophenyl)pentofuranosylamine	C12 H16 N2 O7	-0.01	300.096	299.088	7.586		[M-H]-1
	C13 H14 N2 O3	3.22	246.101	247.109	7.612		[M+H]+1
	C8 H9 O2 P S2	0.42	231.978	230.971	7.618	CO;CO2	[M-H]-1
	C10 H20 N2 O9	-0.07	312.117	311.11	7.619		[M-H]-1
	C4 H8 N3 O7 P S	-2.29	272.981	271.974	7.626	CO;CO2	[M-H]-1
oxazolidinone	C3 H5 N O2	-0.92	87.0319	88.0392	7.627	CH2C=O;CO;CO2;H2O;NH3	[M+H]+1
	C6 H13 N2 O11 P	2.68	320.027	319.019	7.627	C2H5OH	[M-H]-1
	C25 H14 N4 O3 S	1.86	450.079	451.087	7.628		[M+H]+1
	C13 H18 O5 S	4.89	286.089	285.082	7.63	H2O;NH3	[M-H]-1
	C15 H11 N O3 S2	0.85	317.018	318.026	7.63	CO2	[M+H]+1
	C16 H21 N6 O6 P S	-0.09	456.098	455.091	7.63		[M-H]-1
	C17 H17 N O4	-2.52	299.115	300.122	7.63		[M+H]+1
pyrimidone	C4 H4 N2 O	-0.29	96.0323	95.0251	7.63		[M-H]-1
5-(aminomethyl)-3(2H)-isoxazolone	C4 H6 N2 O2	0.05	114.043	113.036	7.63	H2O	[M-H]-1
Asparagine	C4 H8 N2 O3	-1.11	132.053	133.061	7.63	NH3	[M+H]+1
	C7 H18 N2 O14	0.89	354.076	353.069	7.63		[M-H]-1
	C19 H36 N2 O15 P2	0.91	594.16	593.152	7.631		[M-H]-1
Nitroethene	C2 H3 N O2	-1.03	73.0163	74.0236	7.631	CO	[M+H]+1
Oxazole	C3 H3 N O	-0.09	69.0215	70.0287	7.631	CO;HCN;NH3	[M+H]+1
ethylene urea	C3 H6 N2 O	-0.78	86.048	87.0552	7.631	CH2C=O;NH3	[M+H]+1
N-Hydroxysuccinimide	C4 H5 N O3	-0.9	115.027	116.034	7.631	CH2C=O;CO;CO2;H2O;NH3	[M+H]+1
	C8 H16 N4 O6	-0.36	264.107	263.1	7.633		[M-H]-1
12H-[1,3]Benzothiazolo[2,3-b]quinazolin-12-one	C14 H8 N2 O S	-0.92	252.036	251.028	7.641		[M-H]-1
3-(1H-imidazol-4-yl)prop-2-enoic acid	C6 H6 N2 O2	-0.01	138.043	137.036	7.644	CH2C=O;CO2;H2O;HF	[M-H]-1
	C4 H10 N2 O10	1.21	246.034	245.027	7.655		[M-H]-1
	C14 H18 N2 O11 S	0.53	422.063	421.056	7.663		[M-H]-1
asn-asp	C8 H13 N3 O6	-0.46	247.08	248.088	7.665	CH3COOH;H2O;NH3	[M+H]+1
	C5 H9 N2 O P S	0	176.017	177.025	7.685	H2O;NH3	[M+H]+1
	C3 H8 N2 O8	1.25	200.028	199.021	7.801	CO;CO2;CO3;H2O;HCN;NH3	[M-H]-1
	C4 H9 N3 O6	0.85	195.049	196.057	7.804	C4H9;CO2;NH3	[M+H]+1
	C4 H10 N2 O10	1.22	246.034	245.027	7.805		[M-H]-1
N-(2,4-Dinitrophenyl)prolinamide	C11 H12 N4 O5	-0.55	280.081	281.088	7.83	CO2;H2O;NH3	[M+H]+1
N-Acetylcytidine	C11 H15 N3 O6	-0.15	285.096	284.089	7.848	CO2	[M-H]-1
Phenylglyoxylic acid	C8 H6 O3	-0.53	150.032	151.039	8.108		[M+H]+1
	C6 H8 N3 P S2	0.97	216.99	215.983	8.111	CH2C=O;CO;H2O	[M-H]-1
	C11 H8 N2 S	0.44	200.041	199.034	8.177		[M-H]-1
L-Aspartic acid	C4 H7 N O4	-0.4	133.037	132.03	8.209	CH3COOH;CH3OH;CH5O;H2O;HF;NO2	[M-H]-1
	C13 H31 O11 P3	2.52	456.109	455.102	8.212		[M-H]-1
	C15 H25 N O13	-0.5	427.132	426.125	8.212		[M-H]-1
	C12 H22 O11	-0.68	342.116	341.109	8.213		[M-H]-1
	C13 H24 O13	-0.78	388.121	387.114	8.213		[M-H]-1
	C12 H23 Cl O11	-0.48	378.093	377.085	8.217	HCl	[M-H]-1
N-(2,4-Dinitrophenyl)morpholine	C10 H11 N3 O5	-0.26	253.07	254.077	8.264	CO;NH3	[M+H]+1
	C10 H13 N3 O6	0.12	271.08	270.073	8.272	CO2	[M-H]-1
	C13 H24 O13	-0.62	388.121	387.114	8.381		[M-H]-1
	C12 H20 N6 O13	0.48	456.109	455.102	8.383		[M-H]-1
D-(+)-Galactose	C6 H12 O6	0.05	180.063	179.056	8.46	CH3COOH;H2C=O;H2O	[M-H]-1
D-γ-Glu-Gly	C7 H12 N2 O5	-0.05	204.075	203.067	8.499	H2O;Pentose	[M-H]-1
5-Methyl-1-pentofuranosyl-2,4(1H,3H)-pyrimidinedione	C10 H14 N2 O6	-0.49	258.085	259.092	8.5	CO2;H2O;NH3	[M+H]+1
Glu-Glu	C10 H16 N2 O7	-0.53	276.096	277.103	8.505	H2O;Pentose	[M+H]+1
N-(1-deoxy-D-fructos-1-yl)-L-asparagine	C10 H18 N2 O8	-0.5	294.106	295.113	8.506	H2O;Hexose	[M+H]+1
	C9 H14 N8 O8	0.33	362.094	361.086	8.507	Hexose	[M-H]-1
	C8 H12 N8 O6	0.35	316.088	317.095	8.539	CO2;Glucuronic Acid;H2O;Hexose;NH3	[M+H]+1
N-Acetylcytidine	C11 H15 N3 O6	0.18	285.096	284.089	8.561	CO2	[M-H]-1
N-{[(2-Methyl-2-propanyl)oxy]carbonyl}-5-nitrohistidine	C11 H16 N4 O6	-0.53	300.107	301.114	8.646	NH3	[M+H]+1
	C8 H11 N3 O5	0.15	229.07	228.063	9.021	CO2;H2O;NH3	[M-H]-1
asn-asp	C8 H13 N3 O6	-0.37	247.08	248.088	9.024	H2O;NH3	[M+H]+1
Ethyl (2Z)-3-(2,6-diethoxy-5-nitro-4-pyrimidinyl)-2-hydroxyacrylate	C13 H17 N3 O7	-0.45	327.106	328.114	9.79	CH3COOH;H2C=O;H2O;NH3;y-GluAlaGly-2H	[M+H]+1
3-(3-Amino-3-carboxypropyl)uridine	C13 H19 N3 O8	-0.59	345.117	344.11	9.827	CO2	[M-H]-1
