# Supplementary material for: Spatial distribution of glucose and amino acids within all-aqueous emulsions directs the Maillard reaction and oxidation pathways
Source: Research Square preprint supplement (doi:10.21203/rs.3.rs-7307960/v1), 2025-08-19
Supplement: Supplementary file 3 [file a774a593dcbb254b145b1ab2.xlsx]

## Sheet: Compounds 
Name	Formula	Annot. DeltaMass [ppm]	Calc. MW	m/z	RT [min]	Neutral Losses	Reference Ion
5-Hydroxyindole-3-acetic acid	C10 H9 N O3	-0.22	191.058	190.051	1.526	C2H3O2;CO;CO2;H2O	[M-H]-1
8-Hydroxyquinoline	C9 H7 N O	-0.16	145.053	146.06	1.527	CH2C=O;CO;H;H2O	[M+H]+1
Harmine	C13 H12 N2 O	-0.39	212.095	213.102	1.544	C2H5O;C2H5OH;CH3O;CH3OH;H2C=CH2;H2C=O;H2O	[M+H]+1
4-Methyl-2,7-diphenylpyrido[2,3-d]pyrimidin-5(8H)-one	C20 H15 N3 O	-0.32	313.121	314.129	1.553	CH2C=O;CO;H2O;NH3	[M+H]+1
4-Nitrosodiphenylamine	C12 H10 N2 O	-0.42	198.079	199.087	1.561	H2O	[M+H]+1
4-Aminophenol	C6 H7 N O	-1.27	109.053	110.06	1.563	CH3CO;CO;H2C=O;H2O	[M+H]+1
	C8 H11 N O2	-0.25	153.079	154.086	1.564	H2O	[M+H]+1
Ethyl 3-isopropyl-1H-pyrazole-5-carboxylate	C9 H14 N2 O2	-0.5	182.105	183.113	1.564	C2H5O;C2H5OH;CH3COOH;CH3O;CH3OH;H2C=O;H2O	[M+H]+1
	C13 H9 N3 O3	-0.31	255.064	254.057	1.565	CO2	[M-H]-1
Hydroxy β-carboline	C11 H8 N2 O	-0.69	184.064	185.071	1.566	CO;H2O;HCN	[M+H]+1
2-methyl-1,2-dihydrophthalazin-1-one	C9 H8 N2 O	-0.33	160.064	161.071	1.567	CO;CONH2;H2O;HCN;NH3	[M+H]+1
	C23 H16 N4 O2	-0.41	380.127	381.134	1.569	C2H3O2;CO;CO2	[M+H]+1
Actiphenol	C15 H17 N O4	-0.06	275.116	274.108	1.57		[M-H]-1
2-benzoylimino-1-(2-furanylmethyl)-10-methyl-5-oxo-3-dipyrido[3,4-c:1′,2′-f]pyrimidinecarboxylic acid ethyl ester	C27 H22 N4 O5	-0.42	482.159	481.152	1.573		[M-H]-1
3-hydroxy-3-(2-pyridylmethyl)indolin-2-one	C14 H12 N2 O2	-0.38	240.09	241.097	1.575	C2H3O2;CH3COOH;H2C=CH2;H2O	[M+H]+1
	C19 H13 N3	-0.19	283.111	284.118	1.579	H;H2;HCN;NH3	[M+H]+1
	C20 H15 N3 O2	-0.18	329.116	330.124	1.583	CH3COOH;CO;CO2;H2O;NH3	[M+H]+1
2-{6-Methoxy-2-[(1-methyl-1H-imidazol-2-yl)methoxy]-8-quinolinyl}-1H-isoindole-1,3(2H)-dione	C23 H18 N4 O4	-0.42	414.133	413.125	1.583	Pyroglutamic Acid	[M-H]-1
1,3,5-Tribenzoyl-1,3,5-triazinane	C24 H21 N3 O3	0.68	399.159	400.166	1.583	CO2	[M+H]+1
	C15 H10 N2 O2	-0.51	250.074	251.081	1.587	CO;H2C=O;OH	[M+H]+1
N-(2,5-Dimethoxyphenyl)-4-nitrobenzamide	C15 H14 N2 O5	-0.54	302.09	303.097	1.589	CO;CO2;H2O;Pyroglutamic Acid	[M+H]+1
	C17 H22 N3 O9 P	-0.53	443.109	442.102	1.591		[M-H]-1
	C15 H23 N5 O5 S	1.67	385.143	386.15	1.599	CO2	[M+H]+1
	C19 H23 N4 O9 P	-0.19	482.12	481.113	1.602		[M-H]-1
Ethylmalonic acid	C5 H8 O4	0.17	132.042	131.035	1.602	CH3COOH;CO2;H2O	[M-H]-1
2,6-Dimethoxy-N-[4-([1,3]oxazolo[4,5-b]pyridin-2-yl)phenyl]benzamide	C21 H17 N3 O4	-0.44	375.122	376.129	1.604	CO2	[M+H]+1
	C16 H16 N2 O4	-0.29	300.111	301.118	1.609	H2O	[M+H]+1
	C13 H11 N3 O5	-0.04	289.07	288.063	1.612		[M-H]-1
D-Glucono-δ-lactone	C6 H10 O6	0.03	178.048	177.04	1.618	Pentose	[M-H]-1
Pyridoxamine	C8 H12 N2 O2	-0.49	168.09	169.097	1.636	C2H5OH;CH3CO;CH3COOH;CH3O;H2C=O;H2O	[M+H]+1
6-Methoxy-8-nitroquinoline	C10 H8 N2 O3	-0.12	204.053	203.046	1.638	CO2;H2O	[M-H]-1
N1-[4-(1,3-Oxazol-5-yl)phenyl]cyclopropane-1-carboxamide	C13 H12 N2 O2	-0.53	228.09	229.097	1.658	C2H3O2;CH2C=O;CH3COOH;CO;CO2;H2O	[M+H]+1
trans-Azobenzene	C12 H10 N2	-0.75	182.084	183.092	1.659	CH3;H;HCN;NH3	[M+H]+1
2,4,6-Tri(2-pyridinyl)-1,3,5-triazine	C18 H12 N6	-4.42	312.111	311.104	1.671	CO2	[M-H]-1
8-Hydroxyquinoline	C9 H7 N O	-0.55	145.053	146.06	1.747	CH2C=O;CO;H2O	[M+H]+1
N-Acetyl-DL-tryptophan	C13 H14 N2 O3	-0.29	246.1	245.093	1.797	CH2C=O;CO2;Pyroglutamic Acid	[M-H]-1
4-Nitrosodiphenylamine	C12 H10 N2 O	-0.48	198.079	199.087	1.814	H2O	[M+H]+1
Norharman	C11 H8 N2	-0.59	168.069	169.076	1.827	H;HCN	[M+H]+1
6-Methylquinoline	C10 H9 N	-0.31	143.073	144.081	1.913	C2H3;C2H4N;CH3;CH4;H;H2;H2C=CH2;HCCH;HCN;NH3	[M+H]+1
Tryptamine	C10 H12 N2	-0.42	160.1	161.107	1.915	NH3	[M+H]+1
8-Hydroxyquinoline	C9 H7 N O	-0.36	145.053	146.06	2.065	CH2C=O;CO;H;H2O	[M+H]+1
	C10 H7 N O3	-0.05	189.043	188.035	2.102	CO2	[M-H]-1
trans-Azobenzene	C12 H10 N2	-0.65	182.084	183.092	2.141	CH3;H;HCN	[M+H]+1
N1-[4-(1,3-Oxazol-5-yl)phenyl]cyclopropane-1-carboxamide	C13 H12 N2 O2	-0.55	228.09	229.097	2.141	C2H3O2;CH3COOH;CO2;H2O	[M+H]+1
6-Quinolinecarboxylic acid	C10 H7 N O2	-0.5	173.048	174.055	2.17	CO;CO2	[M+H]+1
Nicotine	C10 H14 N2	-0.37	162.116	163.123	2.218		[M+H]+1
	C16 H16 N2 O4	-0.44	300.111	301.118	2.271	H2O	[M+H]+1
ethyl 9H-β-carboline-3-carboxylate	C14 H12 N2 O2	-0.35	240.09	241.097	2.297	C2H3O2;CH3CO;CH3COOH;H2C=CH2;H2O	[M+H]+1
3-(4-Methoxyphenyl)-N-[1-(4-morpholinylmethyl)cyclopentyl]-1,2-oxazole-5-carboxamide	C21 H27 N3 O4	0.02	385.2	386.207	2.3		[M+H]+1
2,6-Dimethoxy-N-[4-([1,3]oxazolo[4,5-b]pyridin-2-yl)phenyl]benzamide	C21 H17 N3 O4	-0.53	375.122	374.114	2.321	CO;H2O	[M-H]-1
	C7 H15 N O3	-0.33	161.105	162.112	2.321	CH3COOH;NH3	[M+H]+1
N-Formyltryptophan	C12 H12 N2 O3	-0.18	232.085	231.077	2.359	CO;CO2	[M-H]-1
Ethyl {3-[(1,3-benzodioxol-5-ylcarbonyl)amino]-1H-pyrazol-1-yl}acetate	C15 H15 N3 O5	-0.08	317.101	316.094	2.36		[M-H]-1
	C13 H8 O8	2.07	292.023	293.03	2.362		[M+H]+1
Tryptamine isomer	C10 H12 N2	-0.45	160.1	161.107	2.363	NH3	[M+H]+1
	C10 H12 O9	1.46	276.049	277.056	2.363	CO2	[M+H]+1
	C11 H8 N8 O3	0.9	300.072	299.065	2.363		[M-H]-1
6-Methylquinoline	C10 H9 N	-0.33	143.073	144.081	2.366	C2H3;CH3;CH4;H;H2;H2C=CH2;HCCH;HCN;NH3	[M+H]+1
	C12 H12 N2 O3	-0.19	232.085	231.077	2.553	CO;CO2	[M-H]-1
3-(1-hydroxyethyl)-2,3,6,7,8,8a-hexahydropyrrolo[1,2-a]pyrazine-1,4-dione	C9 H14 N2 O3	-0.49	198.1	199.108	2.591	H2O	[M+H]+1
2-(3-Nitro-phenyl)-3-p-tolyl-2,3-dihydro-1H-quinazolin-4-one	C21 H17 N3 O3	-0.26	359.127	360.134	2.611	CO2;H2O	[M+H]+1
3-(1-hydroxyethyl)-2,3,6,7,8,8a-hexahydropyrrolo[1,2-a]pyrazine-1,4-dione	C9 H14 N2 O3	-0.41	198.1	199.108	2.782	H2O	[M+H]+1
N-Malonylanthranilic acid	C10 H9 N O5	-0.14	223.048	222.041	3.086	CO2	[M-H]-1
N-Acetylanthranilic acid	C9 H9 N O3	0.1	179.058	178.051	3.09	CH2C=O;CO2	[M-H]-1
4-(4-Nitrophenoxy)aniline	C12 H10 N2 O3	-0.1	230.069	229.062	3.259	CO2	[M-H]-1
	C8 H12 N2 O3	-0.72	184.085	185.092	3.265	H2O	[M+H]+1
Glycolic acid	C2 H4 O3	-0.02	76.016	75.0088	3.417	H2	[M-H]-1
5-Hydroxy-DL-tryptophan	C11 H12 N2 O3	-0.67	220.085	221.092	3.504	H2O;NH3	[M+H]+1
Formyl-anthranilic acid	C8 H7 N O3	0.21	165.043	164.035	3.805	CO;CO2	[M-H]-1
Glycolic acid	C2 H4 O3	-0.11	76.016	75.0088	3.813	CO;H2	[M-H]-1
	C12 H12 N2 O4	-0.19	248.08	247.072	3.818	CO;CO2	[M-H]-1
3-Deoxyglucosone	C6 H10 O5	0.16	162.053	161.046	3.824	CH3COOH;H2C=O;H2O	[M-H]-1
5-Hydroxy-DL-tryptophan	C11 H12 N2 O3	-0.6	220.085	221.092	3.89	H2O;NH3	[M+H]+1
	C20 H15 N3 O2	-0.65	329.116	330.123	3.912	C2H3O2;CH3COOH;CO2;H2O	[M+H]+1
Methyl [1-(4-methoxyphenyl)-5-oxo-4,5-dihydro-1H-pyrazol-3-yl]acetate	C13 H14 N2 O4	-0.09	262.095	261.088	3.915	CO2	[M-H]-1
2,5-dimercaptoterephthalic acid	C8 H6 O4 S2	-0.8	229.971	228.963	3.99		[M-H]-1
1-Phenyl-3-methyl-5-pyrazolone	C10 H10 N2 O	-1.11	174.079	175.086	4.143	CH3CO;H2O;NH3	[M+H]+1
D-(−)-Erythrose	C4 H8 O4	0.21	120.042	119.035	4.217	CH3COOH;H2O	[M-H]-1
	C20 H15 N3 O2	-0.53	329.116	330.124	4.264	C2H3O2;CH3COOH;CO2;Hexose	[M+H]+1
(4-Nitrophenyl)-4-pyridinylmethanone	C12 H8 N2 O3	-0.22	228.053	227.046	4.381	CO;CO2	[M-H]-1
	C17 H28 N5 O9 P S	1.28	509.135	510.142	4.421		[M+H]+1
	C29 H23 N7 O3	-2.56	517.185	516.178	4.441		[M-H]-1
	C24 H29 N O12 S	-0.3	555.141	554.134	4.444		[M-H]-1
	C15 H16 N2 O3	-0.1	272.116	271.109	4.473	CH2C=O;CH3COOH;CO2;Pyroglutamic Acid	[M-H]-1
1-Phenyl-3-methyl-5-pyrazolone	C10 H10 N2 O	-0.97	174.079	175.086	4.502	H2O;NH3	[M+H]+1
Diethanolisopropanolamine	C7 H17 N O3	-0.76	163.121	164.128	4.567	C2H5OH	[M+H]+1
	C3 H6 O8	2.06	170.007	168.999	4.682	CH4;H2O	[M-H]-1
	C21 H19 N3 O2	-0.49	345.148	346.155	4.77	NH3;OH	[M+H]+1
	C10 H16 N2 O3	-0.7	212.116	213.123	4.776	CH3;CH3COOH;H2O	[M+H]+1
	C4 H9 N O2	-1.67	103.063	104.07	4.784	CH3COOH;CO2;H2O;NH3	[M+H]+1
	C4 H3 N7 O3	1.26	197.03	196.023	4.863		[M-H]-1
N-(1H-indol-3-ylacetyl)tryptophan	C21 H19 N3 O3	-0.4	361.142	362.15	4.871	H2O;NH3	[M+H]+1
	C20 H19 N3 O2	-0.52	333.148	334.155	4.922	NH3	[M+H]+1
1-(methylenindole)-tetHβC-3 carboxylic acid	C21 H19 N3 O2	-0.83	345.147	346.155	4.922	NH3	[M+H]+1
Prolinamide	C5 H10 N2 O	-1.59	114.079	115.086	4.929	CO;H2O	[M+H]+1
Ethyl 1,4-dihydro-2-hydroxy-6-methyl-4-phenyl-5-pyrimidinecarboxylate	C14 H16 N2 O3	-0.8	260.116	261.123	4.966	H2O;Pyroglutamic Acid	[M+H]+1
	C6 H13 N O2	-1.05	131.094	132.102	4.969	CH3CH=CH2;CH3COOH	[M+H]+1
Tetrahydrodibenzothiophene	C12 H12 S	-0.32	188.066	189.073	4.97		[M+H]+1
Ethyl 6-(3,4-dimethoxyphenyl)-4-oxo-3-phenyl-4,5,6,7-tetrahydro-1H-indole-2-carboxylate	C25 H25 N O5	1.58	419.174	418.167	4.981		[M-H]-1
	C19 H18 N2 O5	0.32	354.122	355.129	5.001	CH3COOH;CO;H2O	[M+H]+1
Methyl 4-{2-[(2E)-2-(3,4-dimethoxybenzylidene)hydrazino]-2-oxoethoxy}benzoate	C19 H20 N2 O6	-0.58	372.132	371.125	5.004	Pentose-Pentose	[M-H]-1
Indoleacetylaspartate	C14 H14 N2 O5	-0.39	290.09	289.083	5.027	CO2	[M-H]-1
1,8-Diaminooctane	C8 H20 N2	-0.68	144.163	145.17	5.066	NH3	[M+H]+1
	C3 H5 N6 O2 P S	0.89	219.993	218.986	5.068		[M-H]-1
N-(1H-indol-3-ylacetyl)tryptophan isomer	C21 H19 N3 O3	-0.34	361.143	362.15	5.178	H2O;NH3	[M+H]+1
4-Hydroxy-2-(2-hydroxyethyl)-1,2-dihydrophthalazin-1-one	C10 H10 N2 O3	-0.16	206.069	205.062	5.258		[M-H]-1
Nicotine	C10 H14 N2	-0.79	162.116	163.123	5.314		[M+H]+1
[1,2,4]Oxadiazole, 5-(3,4-dimethoxybenzyl)-3-(4-pyrrol-1-ylphenyl)-	C21 H19 N3 O3	-0.29	361.143	362.15	5.331	H2O;NH3	[M+H]+1
Ethyl 1-[(benzyloxy)carbonyl]-4-hydroxyprolylglycinate	C17 H22 N2 O6	-0.5	350.148	351.155	5.379		[M+H]+1
Cyclohexylamine	C6 H13 N	-1.62	99.1046	100.112	5.448	C2H5;C2H6;C3H7;C4H10;C4H8;CH3;CH3CH=CH2;H2C=CH2;NH3	[M+H]+1
	C6 H11 O3 P S	-0.56	194.017	195.024	5.462	CH3COOH;H2O	[M+H]+1
	C5 H6 N8 O11	-2.03	354.015	353.008	5.463		[M-H]-1
Diphenyl sulfone	C12 H10 O2 S	0.28	218.04	217.033	5.495		[M-H]-1
D-(-)-Ribose	C5 H10 O5	0.05	150.053	149.046	5.526	CH3COOH;CO2;H2O	[M-H]-1
[1,2,4]Oxadiazole, 5-(3,4-dimethoxybenzyl)-3-(4-pyrrol-1-ylphenyl)-	C21 H19 N3 O3	-0.23	361.143	362.15	5.533	H2O;NH3	[M+H]+1
	C11 H18 O5 S2	-1.13	294.059	293.052	5.54		[M-H]-1
1,8-Diaminooctane	C8 H20 N2	-0.8	144.163	145.17	5.543	NH3	[M+H]+1
	C6 H2 N2 O7	1.29	213.986	212.979	5.56	CO2	[M-H]-1
	C11 H10 N4 O6	-2.67	294.059	293.052	5.578		[M-H]-1
1-methyl-1,2,3,4-tetrahydro-β-carboline-3-carboxylic acid	C13 H14 N2 O2	-0.94	230.105	231.113	5.582	CO2;NH3	[M+H]+1
	C22 H24 N4 O4	-0.76	408.179	407.172	5.593		[M-H]-1
1H-Inden-1-ylidene	C9 H6	4.27	114.047	115.055	5.593	HCCH	[M+H]+1
	C13 H15 N3 O2	-0.36	245.116	246.124	5.594		[M+H]+1
	C20 H18 N10 O2	0.2	430.162	429.154	5.6		[M-H]-1
	C6 H16 Cl N2 O5 P	-0.25	262.048	261.041	5.6	HCl	[M-H]-1
	C6 H17 N2 O9 P S	-0.65	324.039	323.032	5.601		[M-H]-1
	C22 H22 N6 O8	-1.85	498.149	497.142	5.602		[M-H]-1
	C12 H16 N2 O18	-0.82	476.039	475.032	5.609		[M-H]-1
Skatole	C9 H9 N	1.33	131.074	132.081	5.61	CH3;H;H2;H2C=CH2;HCCH;HCN;NH3	[M+H]+1
	C4 H9 N2 P	2.56	116.051	117.058	5.611	HCN	[M+H]+1
1,5-Naphthalenediamine	C10 H10 N2	-0.7	158.084	159.092	5.613	C2H4N;H;H2;HCN;NH3	[M+H]+1
1-Naphthylisocyanate	C11 H7 N O	-0.91	169.053	170.06	5.613	CO;H2C=O;HCN	[M+H]+1
	C9 H18 N3 O7 P	-0.35	311.088	310.081	5.613		[M-H]-1
Isoquinoline	C9 H7 N	4.28	129.058	130.066	5.613	H2;HCN	[M+H]+1
4-Indolecarbaldehyde	C9 H7 N O	-0.51	145.053	146.06	5.613	CO	[M+H]+1
L-Tryptophan	C11 H12 N2 O2	-1.29	204.09	205.097	5.614	NH3	[M+H]+1
	C11 H9 N O2	-1.03	187.063	188.07	5.614	CH2C=O;CO;CO2;H2O	[M+H]+1
9-Methylbistetrazolo[1,5-a:5′,1′-c]quinoxaline	C9 H6 N8	0.43	226.072	225.065	5.618	NH3	[M-H]-1
	C10 H7 N O	-0.72	157.053	158.06	5.619	CO;H2C=O;H2O;HCN	[M+H]+1
	C10 H9 N O	-0.85	159.068	160.076	5.619	CH2C=O;CH3CO;CO;H;H2C=CH2;H2C=O;H2O;HCN;NH3	[M+H]+1
Indole	C8 H7 N	-0.53	117.058	118.065	5.62	HCN	[M+H]+1
4,4'-Bipyridine	C10 H8 N2	-0.82	156.069	157.076	5.621	H;HCN;NH3	[M+H]+1
	C12 H17 O10 P S	0.7	384.028	385.036	5.622		[M+H]+1
	C5 H11 N8 O5 P	0.34	294.059	293.052	5.622		[M-H]-1
	C14 H17 N2 O4 P S	-0.54	340.064	339.057	5.623		[M-H]-1
	C23 H46 N6 O5	0.13	486.353	487.36	5.654		[M+H]+1
5-Hydroxy-DL-tryptophan	C11 H12 N2 O3	-0.57	220.085	221.092	5.667	H2O;NH3	[M+H]+1
Phthaloyl-DL-alanine	C11 H9 N O4	-0.33	219.053	218.046	5.743	CO;H2O	[M-H]-1
5-Hydroxyindole-3-acetic acid	C10 H9 N O3	-0.17	191.058	190.051	5.745	CH2C=O;CH3COOH;CO;H2O	[M-H]-1
Formylkynurenine	C11 H12 N2 O4	-0.57	236.08	237.087	5.754	CO;NH3	[M+H]+1
D-(+)-Galactose isomer	C6 H12 O6	0.05	180.063	179.056	5.769	CH3COOH;H2O	[M-H]-1
	C9 H18 O9	0.05	270.095	269.088	5.769		[M-H]-1
	C9 H15 N O8	-0.02	265.08	264.072	5.77	CO3	[M-H]-1
Glucoheptonic Acid	C7 H14 O8	-0.43	226.069	225.061	5.778		[M-H]-1
	C14 H16 N2 O5	-0.49	292.106	293.113	5.785	H2O	[M+H]+1
	C6 H13 Cl O6	0.02	216.04	215.033	5.797	HCl	[M-H]-1
2-Carbethoxy-7-nitroindole	C11 H10 N2 O4	-0.67	234.064	235.071	5.832	H2O	[M+H]+1
3-[1-(2-Carboxyethyl)-1H-benzo[d]imidazol-2-yl]propanoic acid	C13 H14 N2 O4	-0.65	262.095	263.102	5.871	H2O	[M+H]+1
Indole-3-pyruvic acid isomer	C11 H9 N O3	-0.74	203.058	204.065	5.887	CH2C=O;CH3COOH;CO2;CO3;H2O	[M+H]+1
L-5-Hydroxytryptophan	C11 H12 N2 O3	-0.58	220.085	221.092	5.892	NH3	[M+H]+1
	C7 H17 N2 O8 P	-0.03	288.072	287.065	5.893		[M-H]-1
6-Methylquinoline	C10 H9 N	-0.42	143.073	144.081	5.9	C2H3;C2H4N;CH3;CH4;H;H2;H2C=CH2;HCCH;HCN;NH3	[M+H]+1
Norharman	C11 H8 N2	-0.66	168.069	169.076	5.9	H;HCN	[M+H]+1
	C11 H8 N8 O2	0.96	284.077	283.07	5.901		[M-H]-1
2,3,4,9-Tetrahydro-1H-β-carboline-3-carboxylic acid	C12 H12 N2 O2	-0.79	216.09	217.097	5.903	CO2;NH3	[M+H]+1
3-methyl-5-phenylpyridazine	C11 H10 N2	-0.7	170.084	171.092	5.905	C2H4N;CH3;CH4;H;H2;HCN;NH3	[M+H]+1
5-Methylthieno[2,3-d][1,3]thiazol-2-amine	C6 H6 N2 S2	-1.3	169.997	168.99	5.997		[M-H]-1
2-Ethoxyethyl 2-methyl-4-(3-nitrophenyl)-6-oxo-1,4,5,6-tetrahydro-3-pyridinecarboxylate	C17 H20 N2 O6	-0.61	348.132	349.139	6.029	H2O;NH3;Pentose	[M+H]+1
D-(+)-Galactose	C6 H12 O6	0.1	180.063	179.056	6.032	CH3COOH;H2C=O	[M-H]-1
	C9 H15 N O8	0.02	265.08	264.072	6.032		[M-H]-1
	C6 H13 Cl O6	0.01	216.04	215.033	6.033	HCl	[M-H]-1
	C9 H18 O9	0.04	270.095	269.088	6.033		[M-H]-1
D-(−)-Erythrose	C4 H8 O4	0.15	120.042	119.035	6.034	CH3COOH;H2C=O;H2O	[M-H]-1
Dimethyl (3S)-3-isopropyl-3-(4-methoxyphenyl)-4-oxo-1,2-diazetidine-1,2-dicarboxylate	C16 H20 N2 O6	-0.34	336.132	337.139	6.056	H2O;Hexose;Pentose	[M+H]+1
2-(3,5-dimethyl-1H-pyrazol-4-yl)-5-methoxybenzoic acid	C13 H14 N2 O3	0	246.1	247.108	6.099	H2O;NH3;Pyroglutamic Acid	[M+H]+1
	C8 H10 O5	0.07	186.053	185.046	6.171	CH2C=O;CH3COOH;CO;CO2;H2O	[M-H]-1
1,5-Naphthalenediamine	C10 H10 N2	-0.63	158.084	159.092	6.175	C2H4N;HCN;NH3	[M+H]+1
5-Hydroxytryptophan	C11 H12 N2 O3	-0.01	220.085	219.078	6.176	CO2	[M-H]-1
1,6-Bismaleimidohexane	C14 H16 N2 O4	-0.65	276.111	277.118	6.194	H2C=O;H2O;NH3	[M+H]+1
	C17 H20 N2 O7	-0.54	364.127	365.134	6.219	H2O;Hexose	[M+H]+1
Formylkynurenine	C11 H12 N2 O4	-0.45	236.08	237.087	6.223	H2O	[M+H]+1
2-(Cyclohexylcarbamoyl)-4-nitrobenzoic acid	C14 H16 N2 O5	-0.34	292.106	293.113	6.372	H2O	[M+H]+1
Indole-3-pyruvic acid	C11 H9 N O3	-0.7	203.058	204.065	6.411	CH2C=O;CO;CO2;CO3;H2O;NO2	[M+H]+1
L-5-Hydroxytryptophan	C11 H12 N2 O3	-0.53	220.085	221.092	6.416	H2O;NH3	[M+H]+1
1-Phenyl-3-methyl-5-pyrazolone	C10 H10 N2 O	-1.26	174.079	175.086	6.417	CO;H2O;NH3	[M+H]+1
3-Hydroxy-2,3-dihydropyrrolo[2,1-b]quinazolin-9(1H)-one	C11 H10 N2 O2	-0.57	202.074	203.081	6.419	CO2;H2O	[M+H]+1
Formylkynurenine	C11 H12 N2 O4	-0.56	236.08	237.087	6.425	H2O	[M+H]+1
1,5-Naphthalenediamine	C10 H10 N2	-0.6	158.084	159.092	6.431	C2H4N;HCN;NH3	[M+H]+1
2-Aminoadipic acid	C6 H11 N O4	-0.67	161.069	162.076	6.471	CH3COOH;H2O;NH3	[M+H]+1
	C6 H13 N O9	-0.02	243.059	242.052	6.605		[M-H]-1
	C9 H15 N O8	0.03	265.08	264.072	6.608		[M-H]-1
	C3 H4 O2	0.12	72.0211	71.0139	6.619	CO;H2C=O;HCCH	[M-H]-1
Glutaric anhydride	C5 H6 O3	0.08	114.032	113.024	6.62	CO	[M-H]-1
	C9 H18 O9	0.03	270.095	269.088	6.623		[M-H]-1
lactide	C6 H8 O4	0.1	144.042	143.035	6.624	CH2C=O;CH3COOH;CO;CO2;H2C=O;H2O	[M-H]-1
D-(−)-Erythrose	C4 H8 O4	0.18	120.042	119.035	6.625	CH3COOH;H2C=O;H2O	[M-H]-1
	C6 H13 Cl O6	0.03	216.04	215.033	6.626	HCl	[M-H]-1
3-Deoxyglucosone	C6 H10 O5	0.16	162.053	161.046	6.628	CH3COOH;H2C=O;NO	[M-H]-1
Hexose isomer	C6 H12 O6	0	180.063	179.056	6.635	CH3COOH	[M-H]-1
Glucoheptonic Acid	C7 H14 O8	0.02	226.069	225.062	6.642		[M-H]-1
	C6 H14 N8 O S	0.14	246.101	247.108	6.647	C4H9;NH3	[M+H]+1
1-(2,4-Dihydroxyquinolin-3-yl)ethan-1-one	C11 H9 N O3	-0.8	203.058	204.065	6.656	CH2C=O;CO;CO2;CO3;H2O	[M+H]+1
D-Glucosamine	C6 H13 N O5	-0.98	179.079	180.086	6.665	H2O	[M+H]+1
L-5-Hydroxytryptophan	C11 H12 N2 O3	-0.6	220.085	221.092	6.673	H2O;NH3	[M+H]+1
1-(2,4-Dihydroxyquinolin-3-yl)ethan-1-one	C11 H9 N O3	-0.93	203.058	204.065	6.749	CH2C=O;CO;CO2;H2O	[M+H]+1
Methyl [1-(4-methoxyphenyl)-5-oxo-4,5-dihydro-1H-pyrazol-3-yl]acetate	C13 H14 N2 O4	-0.78	262.095	263.102	6.803	H2O	[M+H]+1
	C18 H23 N2 O5 P S	-0.62	410.106	411.114	6.87		[M+H]+1
D-Glucosamine	C6 H13 N O5	-0.68	179.079	180.087	6.87	H2O	[M+H]+1
2-Aminoadipic acid	C6 H11 N O4	-0.65	161.069	162.076	6.886	CH3COOH;H2O;NH3	[M+H]+1
	C14 H26 O14 S	-0.58	450.104	449.097	6.892		[M-H]-1
2-Ethoxyethyl 2-methyl-4-(3-nitrophenyl)-6-oxo-1,4,5,6-tetrahydro-3-pyridinecarboxylate	C17 H20 N2 O6	-0.49	348.132	349.139	6.894	CO;CO2;Deoxyhexose;H2O;NH3;Pentose	[M+H]+1
1,6-Bismaleimidohexane	C14 H16 N2 O4	0.02	276.111	275.104	6.895		[M-H]-1
	C20 H25 N3 O9	-0.1	451.159	450.152	6.895		[M-H]-1
L-Tryptophan isomer	C11 H12 N2 O2	-0.03	204.09	203.083	6.897	NH3	[M-H]-1
Ethyl 4-(3,4-dimethoxyphenyl)-6-methyl-2-oxo-1,2,3,4-tetrahydro-5-pyrimidinecarboxylate	C16 H20 N2 O5	-0.65	320.137	321.144	6.897	H2O;OH	[M+H]+1
	C17 H23 Cl N2 O7	-0.47	402.119	401.112	6.905	HCl	[M-H]-1
N-(1-deoxy-D-fructos-1-yl)-L-tryptophan	C17 H22 N2 O7	-0.67	366.142	367.15	6.907	H2O;Hexose;OH	[M+H]+1
	C18 H24 N2 O9	-0.32	412.148	411.141	6.91		[M-H]-1
	C9 H15 N O8	0	265.08	264.072	6.92		[M-H]-1
Glutaric anhydride	C5 H6 O3	0.1	114.032	113.024	6.921	CO;H2C=CH2;H2O	[M-H]-1
lactide	C6 H8 O4	0.12	144.042	143.035	6.921	CH2C=O;CH3COOH;CO;CO2;H2C=O;H2O	[M-H]-1
Glucoheptonic Acid	C7 H14 O8	-0.13	226.069	225.062	6.922		[M-H]-1
	C9 H18 O9	0.07	270.095	269.088	6.923		[M-H]-1
	C6 H13 Cl O6	-0.05	216.04	215.033	6.924		[M-H]-1
D-(−)-Erythrose	C4 H8 O4	0.19	120.042	119.035	6.925	CH3COOH;H2C=O;H2O	[M-H]-1
D-(+)-Glucose	C6 H12 O6	-0.06	180.063	179.056	6.925	CH3COOH	[M-H]-1
6-(α-D-glucosaminyl)-1D-myo-inositol	C12 H23 N O10	-0.61	341.132	342.139	6.989	H2O	[M+H]+1
	C28 H34 N4 O5	3.66	506.255	505.248	7.155		[M-H]-1
	C4 H7 O4 P S	0.29	181.98	180.973	7.155		[M-H]-1
N-Acetylneuraminic acid	C11 H19 N O9	-0.11	309.106	308.099	7.157		[M-H]-1
	C3 H4 O2	0.04	72.0211	71.0139	7.157	CO;H2C=O;HCCH	[M-H]-1
D-(−)-Erythrose	C4 H8 O4	0.18	120.042	119.035	7.157	CH3COOH;H2C=O;H2O	[M-H]-1
D-(-)-Ribose	C5 H10 O5	-0.02	150.053	149.046	7.157	CH3COOH	[M-H]-1
3-Deoxyglucosone	C6 H10 O5	0.1	162.053	161.046	7.157	CH3COOH;H2C=O	[M-H]-1
D-(+)-Glucose	C6 H12 O6	-0.2	180.063	179.056	7.157	CH3COOH	[M-H]-1
	C6 H13 Cl O6	-0.08	216.04	215.033	7.158		[M-H]-1
	C6 H13 N O9	-0.01	243.059	242.052	7.158		[M-H]-1
	C9 H15 N O8	-0.03	265.08	264.072	7.158		[M-H]-1
	C9 H18 O9	0	270.095	269.088	7.158		[M-H]-1
	C6 H14 N8 O S	0.42	246.101	247.109	7.159		[M+H]+1
Glucoheptonic Acid	C7 H14 O8	-0.16	226.069	225.062	7.159		[M-H]-1
Ethanoic anhydride	C4 H6 O3	-0.16	102.032	101.024	7.16	CH2C=O;CO;CO2;H2O	[M-H]-1
Glutaric anhydride	C5 H6 O3	0.05	114.032	113.024	7.16	CO;H2C=CH2;H2O	[M-H]-1
Glutaric acid	C5 H8 O4	0.1	132.042	131.035	7.16	CH3COOH;H2C=O;H2O	[M-H]-1
lactide	C6 H8 O4	0.1	144.042	143.035	7.16	CH2C=O;CH3COOH;CO;CO2;H2C=O;H2O	[M-H]-1
Formylkynurenine	C11 H12 N2 O4	-0.42	236.08	237.087	7.268	H2O;NH3	[M+H]+1
Phenobarbital	C12 H12 N2 O3	-0.74	232.085	233.092	7.284	CO2;NH3	[M+H]+1
Glutaric acid	C5 H8 O4	0.11	132.042	131.035	7.426	CH2C=O;CH3COOH;CO2;H2C=O;H2O	[M-H]-1
Ethanoic anhydride	C4 H6 O3	-0.14	102.032	101.024	7.427	CH2C=O;CO;CO2;H2C=O;H2O	[M-H]-1
Glutaric anhydride	C5 H6 O3	0.08	114.032	113.024	7.427	CO;H2C=CH2;H2O	[M-H]-1
Glucoheptonic Acid	C7 H14 O8	-0.17	226.069	225.062	7.427		[M-H]-1
D-(−)-Erythrose	C4 H8 O4	0.16	120.042	119.035	7.429	CH3COOH;H2C=O;H2O	[M-H]-1
D-(-)-Lyxose	C5 H10 O5	0.02	150.053	149.046	7.429	CH3COOH;H2O	[M-H]-1
	C3 H4 O2	0.06	72.0211	71.0139	7.43	CO;H2C=O;HCCH	[M-H]-1
3-Deoxyglucosone	C6 H10 O5	0.12	162.053	161.046	7.43	CH3COOH;H2C=O	[M-H]-1
D-(+)-Glucose	C6 H12 O6	-0.2	180.063	179.056	7.43	CH3COOH	[M-H]-1
	C8 H9 N3 O7 P2	-0.68	320.991	319.984	7.43	CO2	[M-H]-1
	C6 H13 Cl O6	-0.06	216.04	215.033	7.431		[M-H]-1
	C6 H13 N O9	-0.02	243.059	242.052	7.432		[M-H]-1
	C6 H14 N8 O S	0.5	246.101	247.109	7.432		[M+H]+1
lactide	C6 H8 O4	0.08	144.042	143.035	7.432	C2H3O2;CH2C=O;CH3COOH;CO;CO2;H2C=O;H2O	[M-H]-1
	C9 H15 N O8	-0.05	265.08	264.072	7.434		[M-H]-1
	C9 H18 O9	0.01	270.095	269.088	7.435		[M-H]-1
	C17 H22 N2 O8	-0.61	382.137	383.145	7.701	H2O;Hexose	[M+H]+1
	C18 H20 O6 S	-0.07	364.098	365.105	8.392	Hexose	[M+H]+1
